# Supplementary material
Source: PubMed Central journal article supplement (PMC1885493)
Supplement: blood_blood-2006-09-045351_2.pdf [file blood_blood-2006-09-045351_2.pdf]

The following CALGB member institutions participated in this study:

**Dana Farber-Partners, Boston, MA–Eric P. Winer, M.D., supported by CA32291**

Duke University Medical Center, Durham, NC–Jeffrey Crawford, M.D., supported by  
CA47577

**Long Island Jewish Medical Center, Lake Success, NY–Marc Citron, M.D.,  
supported by CA11028**

**Massachusetts General Hospital, Boston, MA–Michael L. Grossbard, M.D.,  
supported by CA12449**

**Medical University of South Carolina, Charleston, SC–Mark Green, MD, supported  
by CA03927**

Mount Sinai School of Medicine, New York, NY–Lewis R. Silverman, M.D., supported  
by CA04457

North Shore University Hospital, Manhasset, NY–Daniel R Budman, M.D., supported by  
CA35279

Rhode Island Hospital, Providence, RI–William Sikov, M.D., supported by CA08025

Roswell Park Cancer Institute, Buffalo, NY-Ellis Levine, M.D., supported by CA02599

University of Alabama Birmingham, Birmingham, AL-Robert Diasio, M.D., supported  
by CA47545

**University of Chicago, Chicago, IL -Gini Fleming, M.D., supported by CA41287**

University of Iowa, Iowa City, IA-Gerald Clamon, MD, supported by CA47642

**University of Maryland Greenebaum Cancer Center, Baltimore, MD-Martin  
Edelman, M.D., supported by CA31983**

University of Massachusetts Medical School, Worcester, MA-William V. Walsh, M.D.,  
supported by CA37135

**University of Missouri/Ellis Fischel Cancer Center, Columbia, MO-Michael C  
Perry, M.D., supported by CA12046**

University of Nebraska Medical Center, Omaha, NE-Anne Kessinger, M.D., supported  
by CA77298

**University of North Carolina at Chapel Hill, Chapel Hill, NC–Thomas C. Shea,  
M.D., supported by CA47559**

**University of Tennessee Memphis, Memphis, TN–Harvey B. Niell, M.D., supported  
by CA47555**

Wake Forest University School of Medicine, Winston-Salem, NC–David D Hurd, M.D.,  
supported by CA03927

**Walter Reed Army Medical Center, Washington, DC–Thomas Reid, M.D.,  
supported by CA26806**

**Weill Medical College of Cornell University, New York, NY–Scott Wadler, M.D.,  
supported by CA 07968**
